# Supplementary material for: Synthesis and characterisation of fluorescent aminophosphines and their coordination to gold(i)
Source: Royal Society of Chemistry journal article supplement (doi:10.1039/c8dt02256a), 2018-01-01
Supplement: c8dt02256a1.pdf [file c8dt02256a1.pdf]

## Synthesis and characterisation of a series of fluorescent aminophosphines and their coordination to gold(I)

L.M. Groves,<sup>a</sup> B.D. Ward,<sup>a</sup> P.D. Newman,<sup>a</sup> P.N. Horton,<sup>b</sup> S.J. Coles,<sup>b</sup> S.J.A. Pope<sup>a</sup>

<sup>a</sup>School of Chemistry, Main Building, Cardiff University, Cardiff CF10 3AT.

<sup>b</sup>UK National Crystallographic Service, Chemistry, Faculty of Natural and Environmental Sciences, University of Southampton, Highfield, Southampton, SO17 1BJ, England

### Additional X-ray information for [AuCl(L3)]

Table S1.  $\pi$ - $\pi$  interactions between phenyl rings (P) and anthraquinones ( $A_N$  (ring with N bonded),  $A_O$  (ring with O bonded),  $A_E$  (end ring))

| $\pi$ - $\pi$ interaction type | Angle between planes / ° | centroid- centroid distances / Å | shift distance / Å |
|--------------------------------|--------------------------|----------------------------------|--------------------|
| $A_{O1} - A_{O1}$              | 0.00(11)                 | 3.559(2)                         | 1.486(4)           |
| $A_{O31} - A_{O31}$            | 0.02(9)                  | 3.702(2)                         | 1.151(3)           |
| $A_{E31} - A_{E31}$            | 0.03(12)                 | 3.615(2)                         | 1.258(4)           |
| $P_{51} - P_{51}$              | 0.03(13)                 | 3.823(2)                         | 0.961(5)           |
| $A_{N31} - A_{O31}$            | 0.67(10)                 | 3.819(2)                         | 1.484(3)           |
| $A_{N31} - A_{E31}$            | 3.11(11)                 | 3.767(2)                         | 1.109(3)           |
| $A_{N1} - A_{O1}$              | 3.66(11)                 | 3.939(2)                         | 2.263(4)           |
| $A_{N1} - A_{E1}$              | 7.99(12)                 | 3.743(2)                         | 1.360(4)           |

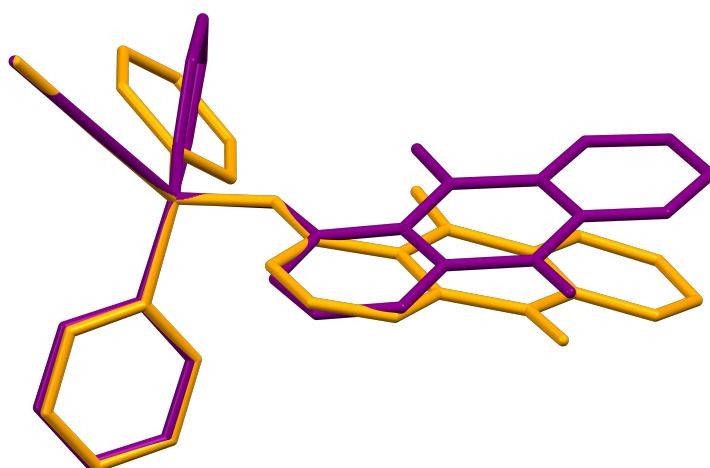

**Figure S1.** Superimposed structures of the two forms of [AuCl(L3)] obtained from the crystal structure.

### DFT parameters

**Table S2** Optimised coordinates for **L3** (acetonitrile)

|   |          |          |          |
|---|----------|----------|----------|
| P | 2.33040  | -0.38695 | -1.08249 |
| O | -1.08969 | 1.46702  | 0.55186  |
| O | -5.09337 | -1.90324 | -0.75752 |
| N | 0.69891  | -0.16147 | -0.52529 |
| H | 0.43449  | 0.69037  | -0.01922 |
| C | -0.36792 | -0.96991 | -0.81190 |
| C | -1.69998 | -0.59502 | -0.46510 |
| C | -1.97596 | 0.67018  | 0.22571  |
| C | -3.38923 | 1.00415  | 0.55022  |
| C | -3.66451 | 2.20898  | 1.20096  |
| H | -2.83144 | 2.86835  | 1.45151  |
| C | -4.97427 | 2.55057  | 1.51723  |
| H | -5.18213 | 3.49484  | 2.02579  |
| C | -6.02391 | 1.69054  | 1.18681  |
| H | -7.05230 | 1.96144  | 1.43641  |
| C | -5.75826 | 0.48971  | 0.54058  |
| H | -6.55958 | -0.20167 | 0.27175  |
| C | -4.44451 | 0.14162  | 0.22008  |
| C | -4.18107 | -1.14266 | -0.46674 |
| C | -2.76507 | -1.47371 | -0.79202 |
| C | -2.53255 | -2.68051 | -1.43267 |
| H | -3.38174 | -3.32443 | -1.66491 |
| C | -1.22341 | -3.04689 | -1.75602 |
| H | -1.02912 | -4.00151 | -2.25059 |
| C | -0.16503 | -2.21750 | -1.44681 |
| H | 0.85528  | -2.52446 | -1.69400 |

|   |         |          |          |
|---|---------|----------|----------|
| C | 3.10241 | -1.22593 | 0.36399  |
| C | 2.37649 | -1.70877 | 1.45600  |
| H | 1.29525 | -1.54600 | 1.50599  |
| C | 3.02654 | -2.38774 | 2.48705  |
| H | 2.45016 | -2.75906 | 3.33873  |
| C | 4.40362 | -2.58888 | 2.43616  |
| H | 4.91069 | -3.11971 | 3.24594  |
| C | 5.13427 | -2.11367 | 1.34608  |
| H | 6.21525 | -2.27000 | 1.29990  |
| C | 4.48571 | -1.44485 | 0.31325  |
| H | 5.06275 | -1.07992 | -0.54503 |
| C | 2.91294 | 1.33333  | -0.80961 |
| C | 2.92398 | 1.93996  | 0.45421  |
| H | 2.59698 | 1.37516  | 1.33435  |
| C | 3.35337 | 3.25520  | 0.59731  |
| H | 3.35619 | 3.72300  | 1.58517  |
| C | 3.78739 | 3.97388  | -0.51802 |
| H | 4.13020 | 5.00529  | -0.40221 |
| C | 3.78758 | 3.37732  | -1.77599 |
| H | 4.12960 | 3.93756  | -2.64980 |
| C | 3.34965 | 2.06128  | -1.92087 |
| H | 3.34602 | 1.59093  | -2.90947 |

**Table S3** Optimised coordinates for **L3** (chloroform)

|   |          |          |          |
|---|----------|----------|----------|
| P | 2.32817  | -0.38831 | -1.08018 |
| O | -1.08868 | 1.45814  | 0.57235  |
| O | -5.09677 | -1.89440 | -0.76565 |
| N | 0.69828  | -0.16273 | -0.51878 |
| H | 0.43453  | 0.68876  | -0.01118 |
| C | -0.36986 | -0.96775 | -0.81206 |
| C | -1.70164 | -0.59346 | -0.46395 |
| C | -1.97572 | 0.66739  | 0.23624  |
| C | -3.38948 | 1.00306  | 0.55840  |
| C | -3.66290 | 2.20552  | 1.21433  |
| H | -2.82727 | 2.86019  | 1.46890  |
| C | -4.97242 | 2.54835  | 1.52897  |
| H | -5.17953 | 3.49088  | 2.04137  |
| C | -6.02329 | 1.69212  | 1.19223  |
| H | -7.05170 | 1.96443  | 1.44090  |
| C | -5.75936 | 0.49384  | 0.54107  |
| H | -6.56008 | -0.19599 | 0.26627  |
| C | -4.44564 | 0.14481  | 0.22182  |
| C | -4.18398 | -1.13729 | -0.47118 |
| C | -2.76773 | -1.46810 | -0.79722 |
| C | -2.53713 | -2.67130 | -1.44525 |
| H | -3.38866 | -3.31080 | -1.68129 |
| C | -1.22845 | -3.03713 | -1.76960 |
| H | -1.03493 | -3.98893 | -2.27020 |
| C | -0.16873 | -2.21143 | -1.45457 |

|   |         |          |          |
|---|---------|----------|----------|
| H | 0.85148 | -2.51754 | -1.70331 |
| C | 3.10257 | -1.22599 | 0.36571  |
| C | 2.37406 | -1.73347 | 1.44450  |
| H | 1.28998 | -1.58819 | 1.48545  |
| C | 3.02450 | -2.41501 | 2.47336  |
| H | 2.44564 | -2.80575 | 3.31465  |
| C | 4.40463 | -2.59427 | 2.43369  |
| H | 4.91211 | -3.12720 | 3.24187  |
| C | 5.13808 | -2.09412 | 1.35700  |
| H | 6.22190 | -2.23248 | 1.31986  |
| C | 4.48939 | -1.42267 | 0.32645  |
| H | 5.06884 | -1.03699 | -0.52103 |
| C | 2.91439 | 1.33106  | -0.81114 |
| C | 2.94257 | 1.93509  | 0.45326  |
| H | 2.62708 | 1.36809  | 1.33604  |
| C | 3.37427 | 3.24967  | 0.59303  |
| H | 3.39003 | 3.71558  | 1.58168  |
| C | 3.79359 | 3.97019  | -0.52630 |
| H | 4.13816 | 5.00137  | -0.41311 |
| C | 3.77667 | 3.37631  | -1.78520 |
| H | 4.10700 | 3.93836  | -2.66242 |
| C | 3.33654 | 2.06094  | -1.92659 |
| H | 3.31897 | 1.59184  | -2.91569 |

**Table S4** Optimised coordinates for [AuCl(L3)] (acetonitrile)

|    |          |          |          |
|----|----------|----------|----------|
| Au | 2.25425  | -1.23428 | -0.92629 |
| Cl | 3.15357  | -3.07033 | -2.09680 |
| P  | 1.37371  | 0.55936  | 0.20530  |
| O  | -2.50267 | 1.76476  | -0.52249 |
| O  | -5.50480 | -2.48655 | 0.88299  |
| N  | -0.32086 | 0.57860  | 0.32966  |
| H  | -0.83300 | 1.36153  | -0.10051 |
| C  | -1.14318 | -0.48052 | 0.66675  |
| C  | -2.54234 | -0.41598 | 0.42570  |
| C  | -3.15758 | 0.77284  | -0.18940 |
| C  | -4.62569 | 0.77260  | -0.41278 |
| C  | -5.21882 | 1.89534  | -0.99456 |
| H  | -4.58364 | 2.73944  | -1.26923 |
| C  | -6.59105 | 1.92585  | -1.21420 |
| H  | -7.04912 | 2.80670  | -1.66969 |
| C  | -7.38418 | 0.83446  | -0.85405 |
| H  | -8.46223 | 0.86125  | -1.02765 |
| C  | -6.80141 | -0.28606 | -0.27444 |
| H  | -7.39913 | -1.15228 | 0.01634  |
| C  | -5.42396 | -0.32285 | -0.05154 |
| C  | -4.82106 | -1.52482 | 0.56633  |
| C  | -3.34662 | -1.52237 | 0.78882  |
| C  | -2.79151 | -2.65604 | 1.36643  |
| H  | -3.44851 | -3.48613 | 1.62907  |

|   |          |          |          |
|---|----------|----------|----------|
| C | -1.41953 | -2.70570 | 1.60563  |
| H | -0.97447 | -3.58831 | 2.07005  |
| C | -0.60913 | -1.63506 | 1.27005  |
| H | 0.46106  | -1.68487 | 1.48949  |
| C | 1.98861  | 0.72029  | 1.90627  |
| C | 1.14737  | 1.09124  | 2.95981  |
| H | 0.08274  | 1.26423  | 2.77541  |
| C | 1.66861  | 1.23514  | 4.24338  |
| H | 1.00970  | 1.52030  | 5.06687  |
| C | 3.02465  | 1.01477  | 4.47605  |
| H | 3.42998  | 1.12718  | 5.48454  |
| C | 3.86511  | 0.64418  | 3.42653  |
| H | 4.92743  | 0.46693  | 3.60954  |
| C | 3.34855  | 0.48932  | 2.14424  |
| H | 4.00507  | 0.18563  | 1.32117  |
| C | 1.67294  | 2.16443  | -0.57829 |
| C | 1.33605  | 3.34935  | 0.09020  |
| H | 0.91153  | 3.31437  | 1.09858  |
| C | 1.54821  | 4.57651  | -0.52764 |
| H | 1.28417  | 5.49933  | -0.00613 |
| C | 2.10269  | 4.62766  | -1.80702 |
| H | 2.27288  | 5.59426  | -2.28736 |
| C | 2.44362  | 3.45260  | -2.47169 |
| H | 2.87984  | 3.49304  | -3.47226 |
| C | 2.22879  | 2.21962  | -1.86011 |
| H | 2.49452  | 1.29358  | -2.38021 |

**Table S5** Optimised coordinates for [AuCl(L3)] (chloroform)

|    |          |          |          |
|----|----------|----------|----------|
| Au | 2.27156  | -1.22533 | -0.92550 |
| Cl | 3.20905  | -3.03158 | -2.08887 |
| P  | 1.36746  | 0.55531  | 0.20568  |
| O  | -2.51235 | 1.76602  | -0.50420 |
| O  | -5.51072 | -2.49851 | 0.86764  |
| N  | -0.32795 | 0.57088  | 0.32547  |
| H  | -0.84159 | 1.35511  | -0.10104 |
| C  | -1.14876 | -0.49260 | 0.65463  |
| C  | -2.54848 | -0.42634 | 0.41727  |
| C  | -3.16493 | 0.76810  | -0.18546 |
| C  | -4.63248 | 0.76620  | -0.41357 |
| C  | -5.22543 | 1.89141  | -0.99086 |
| H  | -4.58910 | 2.73692  | -1.25869 |
| C  | -6.59680 | 1.92044  | -1.21435 |
| H  | -7.05519 | 2.80277  | -1.66697 |
| C  | -7.38911 | 0.82579  | -0.86219 |
| H  | -8.46678 | 0.85171  | -1.03914 |
| C  | -6.80657 | -0.29679 | -0.28680 |
| H  | -7.40174 | -1.16665 | -0.00151 |
| C  | -5.42974 | -0.33230 | -0.06070 |
| C  | -4.82692 | -1.53745 | 0.55280  |

|   |          |          |          |
|---|----------|----------|----------|
| C | -3.35170 | -1.53614 | 0.77206  |
| C | -2.79525 | -2.67489 | 1.33789  |
| H | -3.45303 | -3.50679 | 1.59299  |
| C | -1.42267 | -2.72642 | 1.57228  |
| H | -0.97549 | -3.61422 | 2.02475  |
| C | -0.61308 | -1.65244 | 1.24545  |
| H | 0.45827  | -1.70546 | 1.45862  |
| C | 1.97261  | 0.71634  | 1.91115  |
| C | 1.12390  | 1.07608  | 2.96237  |
| H | 0.05887  | 1.24111  | 2.77252  |
| C | 1.63708  | 1.21733  | 4.24931  |
| H | 0.97175  | 1.49308  | 5.07098  |
| C | 2.99321  | 1.00520  | 4.48812  |
| H | 3.39244  | 1.11498  | 5.49939  |
| C | 3.84126  | 0.64525  | 3.44136  |
| H | 4.90367  | 0.47332  | 3.62898  |
| C | 3.33246  | 0.49303  | 2.15579  |
| H | 3.99503  | 0.19606  | 1.33507  |
| C | 1.66274  | 2.16576  | -0.56954 |
| C | 1.32215  | 3.34746  | 0.10223  |
| H | 0.89815  | 3.30712  | 1.11067  |
| C | 1.53079  | 4.57714  | -0.51126 |
| H | 1.26383  | 5.49761  | 0.01304  |
| C | 2.08550  | 4.63413  | -1.79011 |
| H | 2.25283  | 5.60285  | -2.26733 |
| C | 2.43032  | 3.46247  | -2.45822 |
| H | 2.86688  | 3.50712  | -3.45848 |
| C | 2.21906  | 2.22701  | -1.85073 |
| H | 2.48799  | 1.30317  | -2.37324 |

**Table S6** TD-DFT data for L3

| #  | State   | Transition energy (nm)    | Participating MO                                                     | Transition character                            |
|----|---------|---------------------------|----------------------------------------------------------------------|-------------------------------------------------|
| 1  | Singlet | 465 (0.1397) <sup>a</sup> | HOMO → LUMO (0.70) <sup>b</sup>                                      | $\pi \rightarrow \pi^*$ , $n \rightarrow \pi^*$ |
| 2  | Singlet | 403 (0.0153)              | HOMO-5 → LUMO (0.49); HOMO-1 → LUMO (0.41)                           | $\pi \rightarrow \pi^*$ , $n \rightarrow \pi^*$ |
| 3  | Singlet | 376 (0.0177)              | HOMO-1 → LUMO (0.45); HOMO-8 → LUMO (0.38)                           | $\pi \rightarrow \pi^*$ , $n \rightarrow \pi^*$ |
| 4  | Singlet | 347 (0.0086)              | HOMO-8 → LUMO (0.39); HOMO-1 → LUMO (0.34); HOMO-10 → LUMO (0.33)    | $\pi \rightarrow \pi^*$ , $n \rightarrow \pi^*$ |
| 5  | Singlet | 335 (0.0019)              | HOMO-6 → LUMO (0.66)                                                 | $\pi \rightarrow \pi^*$                         |
| 6  | Singlet | 314 (0.0425)              | HOMO-7 → LUMO (0.66)                                                 | $\pi \rightarrow \pi^*$                         |
| 7  | Singlet | 310 (0.2202)              | HOMO → LUMO+1 (0.64)                                                 | $\pi \rightarrow \pi^*$ , $n \rightarrow \pi^*$ |
| 8  | Singlet | 308 (0.0004)              | HOMO-2 → LUMO (0.68)                                                 | $\pi \rightarrow \pi^*$                         |
| 9  | Singlet | 301 (0.0005)              | HOMO-3 → LUMO (0.65)                                                 | $\pi \rightarrow \pi^*$                         |
| 10 | Singlet | 297 (0.0007)              | HOMO-4 → LUMO (0.67)                                                 | $\pi \rightarrow \pi^*$                         |
| 11 | Singlet | 281 (0.0273)              | HOMO → LUMO+2 (0.65)                                                 | $\pi \rightarrow \pi^*$ , $n \rightarrow \pi^*$ |
| 12 | Singlet | 272 (0.1444)              | HOMO-9 → LUMO (0.57); HOMO-10 → LUMO (0.30)                          | $\pi \rightarrow \pi^*$ , $n \rightarrow \pi^*$ |
| 13 | Singlet | 271 (0.0111)              | HOMO-1 → LUMO+1 (0.39); HOMO-10 → LUMO (-0.36); HOMO-8 → LUMO (0.32) | $\pi \rightarrow \pi^*$ , $n \rightarrow \pi^*$ |
| 14 | Singlet | 270 (0.0561)              | HOMO-1 → LUMO+1 (0.63); HOMO-9 → LUMO (-                             | $\pi \rightarrow \pi^*$ , $n \rightarrow \pi^*$ |

|    |         |              |                                                      |                                                 |
|----|---------|--------------|------------------------------------------------------|-------------------------------------------------|
|    |         |              | 0.33); HOMO-10 → LUMO<br>(0.31)                      |                                                 |
| 15 | Singlet | 266 (0.0286) | HOMO → LUMO+3<br>(0.63)                              | $\pi \rightarrow \pi^*$ , $n \rightarrow \pi^*$ |
| 16 | Singlet | 259 (0.0724) | HOMO → LUMO+4<br>(0.66)                              | $\pi \rightarrow \pi^*$ , $n \rightarrow \pi^*$ |
| 17 | Singlet | 254 (0.0071) | HOMO-1 → LUMO+2<br>(0.52); HOMO-5 → LUMO+1<br>(0.30) | $\pi \rightarrow \pi^*$ , $n \rightarrow \pi^*$ |
| 18 | Singlet | 252 (0.0008) | HOMO → LUMO+5<br>(0.55)                              | $\pi \rightarrow \pi^*$ , $n \rightarrow \pi^*$ |
| 19 | Singlet | 250 (0.0148) | HOMO-5 → LUMO+1<br>(0.43); HOMO-1 → LUMO+2<br>(0.39) | $\pi \rightarrow \pi^*$ , $n \rightarrow \pi^*$ |
| 20 | Singlet | 243 (0.0091) | HOMO → LUMO+6<br>(0.48)                              | $\pi \rightarrow \pi^*$ , $n \rightarrow \pi^*$ |

---

<sup>a</sup> Oscillator strength; <sup>b</sup> expansion coefficient



**Table S7** TD-DFT data for [AuCl(L3)]

| #  | State   | Transition energy (nm)    | Participating MO                                                                                 | Transition character                                                                                   |
|----|---------|---------------------------|--------------------------------------------------------------------------------------------------|--------------------------------------------------------------------------------------------------------|
| 1  | Singlet | 417 (0.1857) <sup>a</sup> | HOMO → LUMO (0.69) <sup>b</sup>                                                                  | $\pi \rightarrow \pi^*$ , $n \rightarrow \pi^*$ , $\sigma_{\text{AuP}} \rightarrow \pi^*$ <sup>c</sup> |
| 2  | Singlet | 397 (0.0018)              | HOMO-7 → LUMO (0.41);<br>HOMO-3 → LUMO (0.30)                                                    | $\pi \rightarrow \pi^*$ , $n \rightarrow \pi^*$ , MLCT                                                 |
| 3  | Singlet | 357 (0.0006)              | HOMO-11 → LUMO (0.60)                                                                            | $n \rightarrow \pi^*$ , ILCT                                                                           |
| 4  | Singlet | 340 (0.0068)              | HOMO-8 → LUMO (0.31);<br>HOMO-7 → LUMO (0.32);<br>HOMO-2 → LUMO (0.31);<br>HOMO-1 → LUMO (-0.31) | $\pi \rightarrow \pi^*$ , $n \rightarrow \pi^*$ , MLCT, $\sigma_{\text{AuP}} \rightarrow \pi^*$        |
| 5  | Singlet | 320 (0.0785)              | HOMO-6 → LUMO (0.61)                                                                             | $\pi \rightarrow \pi^*$                                                                                |
| 6  | Singlet | 318 (0.0052)              | HOMO-1 → LUMO (0.59)                                                                             | $\pi \rightarrow \pi^*$ , $\sigma_{\text{AuP}} \rightarrow \pi^*$                                      |
| 7  | Singlet | 297 (0.0031)              | HOMO-2 → LUMO (0.47);<br>HOMO-3 → LUMO (-0.44)                                                   | $\pi \rightarrow \pi^*$ , $n \rightarrow \pi^*$ , MLCT                                                 |
| 8  | Singlet | 295 (0.0006)              | HOMO-5 → LUMO (0.47);<br>HOMO-4 → LUMO (-0.46)                                                   | $\pi \rightarrow \pi^*$ , $n \rightarrow \pi^*$ , MLCT                                                 |
| 9  | Singlet | 294 (0.0026)              | HOMO-3 → LUMO (0.40)                                                                             | $\pi \rightarrow \pi^*$ , $n \rightarrow \pi^*$ , MLCT                                                 |
| 10 | Singlet | 293 (0.0094)              | HOMO-7 → LUMO (0.32);<br>HOMO-5 → LUMO (0.30);<br>HOMO-4 → LUMO (0.37)                           | $\pi \rightarrow \pi^*$ , $n \rightarrow \pi^*$ , MLCT                                                 |
| 11 | Singlet | 292 (0.1602)              | HOMO → LUMO+1 (0.64)                                                                             | $\pi \rightarrow \pi^*$ , $n \rightarrow \pi^*$ , $\sigma_{\text{AuP}} \rightarrow \pi^*$              |
| 12 | Singlet | 285 (0.0027)              | HOMO-9 → LUMO (0.65)                                                                             | $\pi \rightarrow \pi^*$ , $n \rightarrow \pi^*$ , MLCT                                                 |
| 13 | Singlet | 275 (0.0259)              | HOMO → LUMO+2 (0.67)                                                                             | $\pi \rightarrow \pi^*$ , $n \rightarrow \pi^*$ , $\sigma_{\text{AuP}} \rightarrow \pi^*$              |
| 14 | Singlet | 274 (0.0359)              | HOMO-10 → LUMO (0.67)                                                                            | $\pi \rightarrow \pi^*$ , $n \rightarrow \pi^*$ , MLCT                                                 |

|    |         |              |                                                                                            |                                                                                                        |
|----|---------|--------------|--------------------------------------------------------------------------------------------|--------------------------------------------------------------------------------------------------------|
| 15 | Singlet | 271 (0.1979) | HOMO-1 →<br>LUMO (0.65)                                                                    | $\pi \rightarrow \pi^*$ ,<br>$\sigma_{\text{AuP}} \rightarrow \pi^*$                                   |
| 16 | Singlet | 261 (0.0408) | HOMO →<br>LUMO+3<br>(0.68)                                                                 | $\pi \rightarrow \pi^*$ , $n \rightarrow \pi^*$ ,<br>$\sigma_{\text{AuP}} \rightarrow \pi^*$           |
| 17 | Singlet | 255 (0.0092) | HOMO-7 →<br>LUMO+1<br>(0.32); HOMO-<br>3 → LUMO+1<br>(0.28)                                | $\pi \rightarrow \pi^*$ , $n \rightarrow \pi^*$ ,<br>MLCT                                              |
| 18 | Singlet | 252 (0.0298) | HOMO-1 →<br>LUMO+1<br>(0.43); HOMO-<br>1 → LUMO+2<br>(0.31)                                | $\pi \rightarrow \pi^*$ ,<br>$\sigma_{\text{AuP}} \rightarrow \pi^*$                                   |
| 19 | Singlet | 250 (0.0544) | HOMO-1 →<br>LUMO+2<br>(0.32); HOMO-<br>1 → LUMO+4<br>(0.31); HOMO-<br>1 → LUMO+5<br>(0.38) | $\pi \rightarrow \pi^*$ , $n \rightarrow \pi^*$ ,<br>$\sigma_{\text{AuP}} \rightarrow \pi^*$           |
| 20 | Singlet | 245 (0.1161) | HOMO-13 →<br>LUMO (0.42)                                                                   | $\pi \rightarrow \pi^*$ , $n \rightarrow \pi^*$ ,<br>$\sigma_{\text{AuP}} \rightarrow \pi^*$ ,<br>MLCT |

---

<sup>a</sup> Oscillator strength; <sup>b</sup> expansion coefficient; <sup>c</sup> occupied orbital contains electron density associated with the Au–P bond, derived from the P lone pair in the free ligand
